# Supplementary material
Source: Springer Nature journal article supplement (https://www.springermedizin.de/resource/supplementary/13618_2013_71_MOESM3_ESM.pdf/9681094)

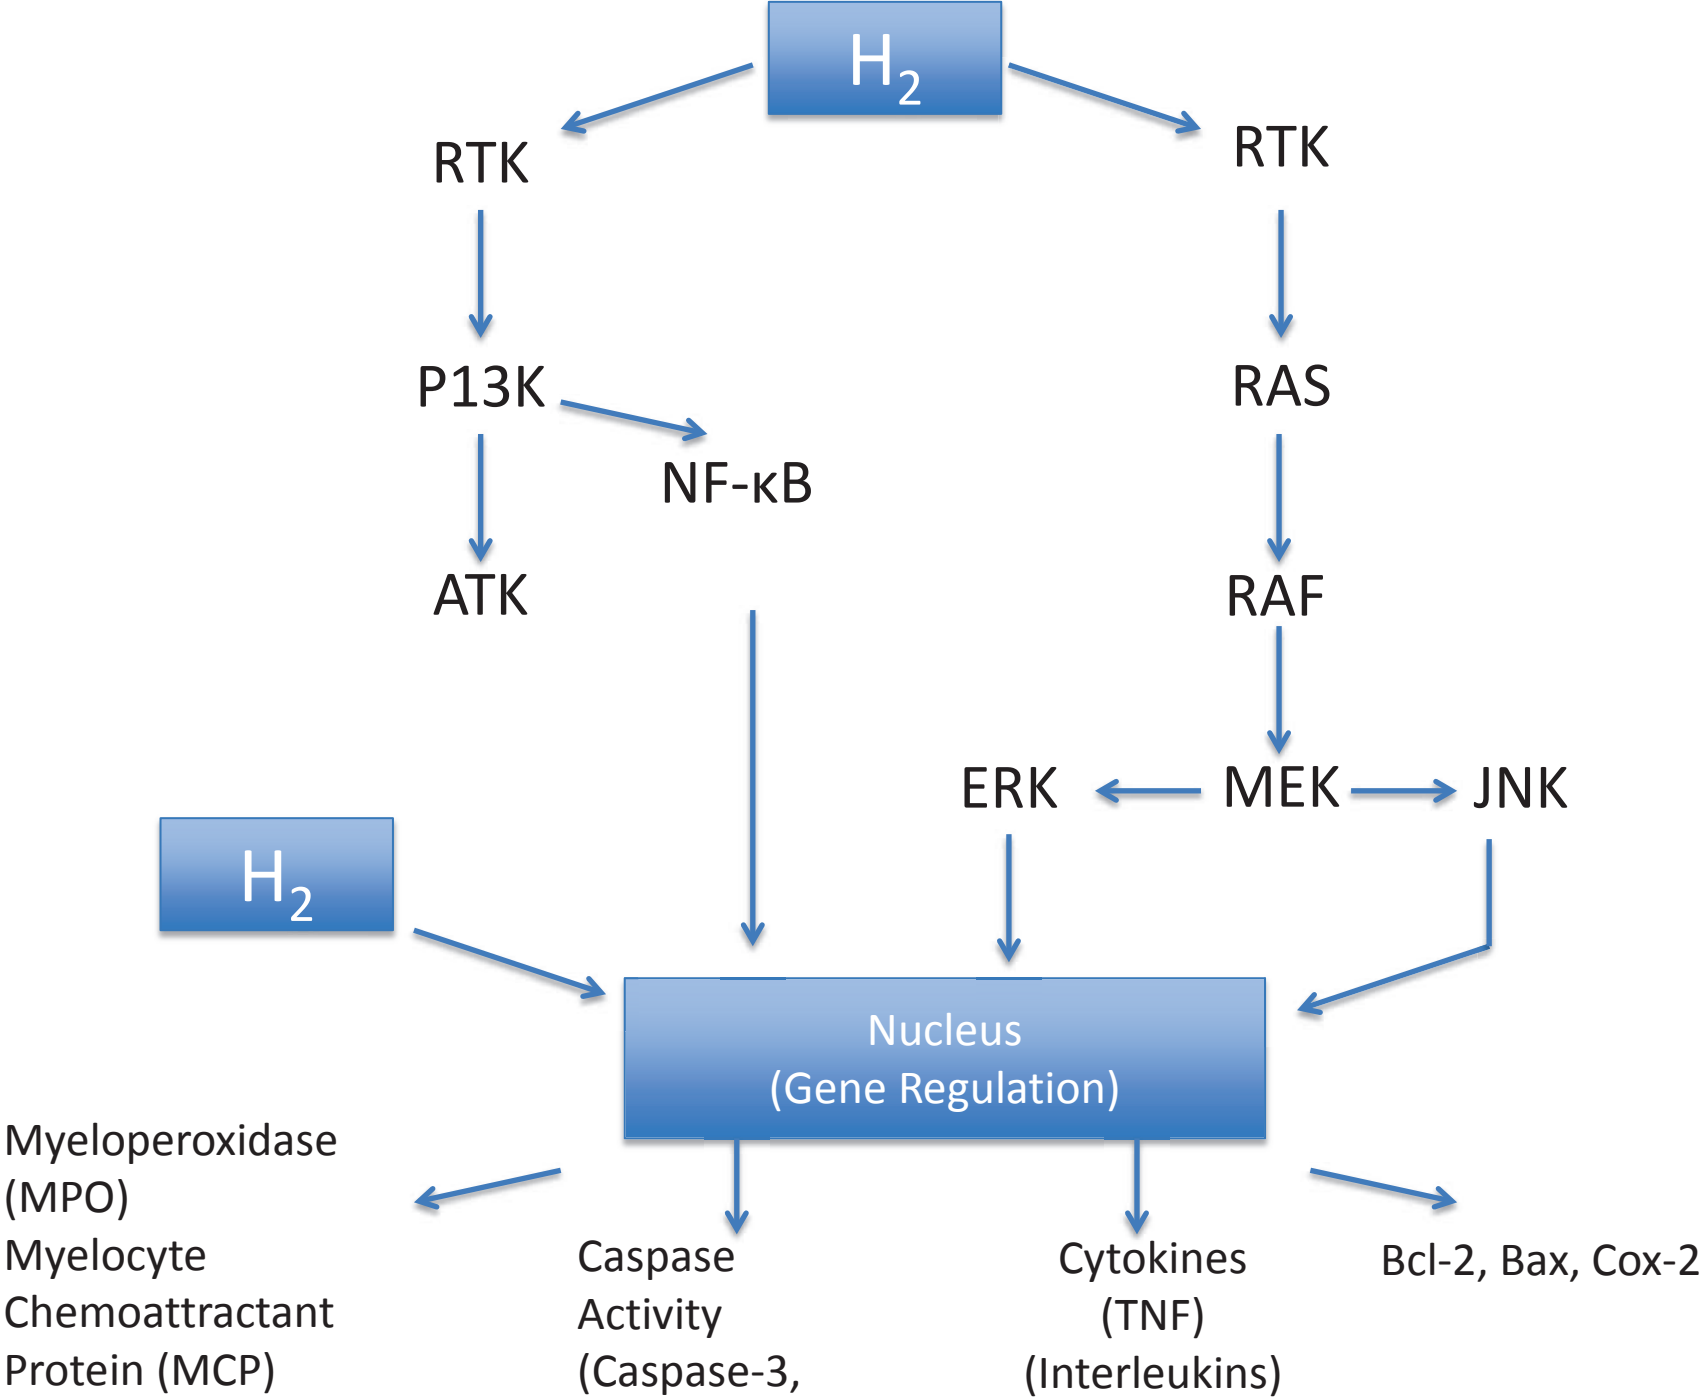

Supplement: MOESM3 [file 9681094]
